# Supplementary material for: A novel aluminoborate open-framework [In(dien)2][Al2B7O16H2] with large chiral cavities templated by chiral main group metal complexes
Source: Royal Society of Chemistry journal article supplement (doi:10.1039/c3cc47440b), 2013-10-31
Supplement: c3cc47440b.pdf [file c3cc47440b.pdf]

## Supporting Information

# A novel aluminoborate open-framework $[\text{In}(\text{dien})_2][\text{Al}_2\text{B}_7\text{O}_{16}\text{H}_2]$ with large chiral cavities templated by main group metal complexes

Lin Cheng, and Guo-Yu Yang\*

State Key Laboratory of Structural Chemistry, Fujian Institute of Research on the Structure of Matter, Chinese Academy of Sciences, Fuzhou, Fujian 350002, China. E-mail: ygy@fjirsm.ac.cn

Table S1. Hydrogen bonds data for **1**.<sup>a</sup>

| D-H...A             | <i>d</i> (D-H) | <i>d</i> (H...A) | <i>d</i> (D...A) | <(DHA) |
|---------------------|----------------|------------------|------------------|--------|
| N(2)-H(2A)...O(1)#1 | 0.90           | 2.12             | 2.84(2)          | 135.8  |
| N(2)-H(2A)...O(3)#1 | 0.90           | 2.64             | 3.45(2)          | 150.9  |
| N(2)-H(2B)...O(1)#2 | 0.90           | 2.62             | 3.20(2)          | 122.8  |
| N(1)-H(1A)...O(1)#3 | 0.90           | 2.11             | 2.98(1)          | 163.0  |
| N(3)-H(3C)...O(3)#2 | 0.90           | 2.09             | 2.98(2)          | 172.7  |
| N(3)-H(3D)...O(3)#4 | 0.90           | 2.35             | 3.22(2)          | 160.4  |

<sup>a</sup>Symmetric codes: #1 -y+0.75, -x+0.25, z+0.25; #2 y-0.75, x+0.25, z+0.25; #3 x, y-0.5, -z; #4 -x, -y+1, -z.

## Experimental Section

All chemicals employed in this study were analytical reagent. IR spectra (KBr pellets) were recorded on an ABB Bomen MB 102 spectro-meter. Thermal analyses were performed in a dynamic oxygen atmosphere with a heating rate of 10 °C/min using a METTLER TGA/SDTA 851e thermal analyzer. The X-ray diffraction data were collected on a SuperNova, Atlas diffractometer equipped with mirror-monochromated CuK $\alpha$  radiation ( $\lambda = 1.5418 \text{ \AA}$ ) at room temperature. The structure was solved by direct methods and refined on  $F^2$  by full-matrix, least-squares methods using the SHELEL-97 program package. Powder XRD patterns of polycrystalline sample was collected on a Philips X'Pert-MPD diffractometer using CuK $\alpha$  radiation ( $\lambda = 1.540598 \text{ \AA}$ ) at room temperature in the angular range of  $2\theta = 5\text{--}50^\circ$  with a step size of  $0.02^\circ$ . The UV diffuse reflection data were recorded at room temperature using a powder sample with BaSO $_4$  as a standard (100% reflectance) on a PerkinElmer Lambda-950 UV spectrophotometer and scanned at 200-800 nm.

### Synthesis:

A mixture of H $_3$ BO $_3$  (0.372 g, 6 mmol), Al(i-PrO) $_3$  (0.204 g, 1 mmol) and In(i-PrO) $_3$  (0.147g, 0.25mmol) was added to the mixture of 0.5 mL H $_2$ O, 3 mL pyridine and 0.5 mL dien, and stirred for about one hour, the final solution was sealed in a 30 mL Teflon-lined stainless steel autoclave and heated at 180 °C for 7 days under autogenous pressure, and then cooled to room temperature. The pure, colorless, colorless quadrangular prism crystals of **1** were obtained (yield 32% based on In(i-PrO) $_3$ ). By calculation, when one formula absorbs two water molecules from the air to become **1**·2H $_2$ O, the calculated and observed values of the C, H, N, B, Al and In atoms are in good accordance with each other (elemental analysis calcd (%) for **1**·2H $_2$ O: C 12.90, N 11.28, H 4.33, B 10.16, Al 7.24, In 15.41; found: C 12.86, N 11.39, H 4.15, B 10.50, Al 6.79, In 15.19), which are accordant with TGA analysis.

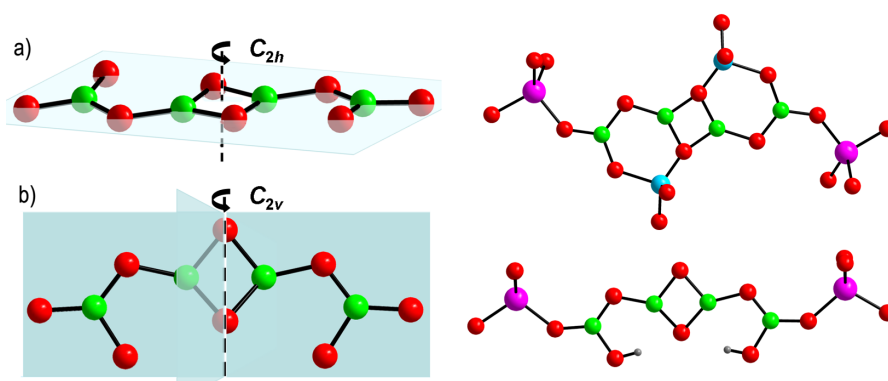

**Fig. S1** Comparison of the B $_4$ O $_8$  units in **a**) [In(dien) $_2$ ][Al $_2$ B $_7$ O $_{16}$ H $_2$ ] (**1**) and **b**) [M(en) $_3$ ][AlB $_7$ O $_{12}$ (OH) $_2$ ](H $_2$ O) $_{0.25}$  (**2**, M = Co/Ni), showing different coordination modes for the B $_4$ O $_8$  units.

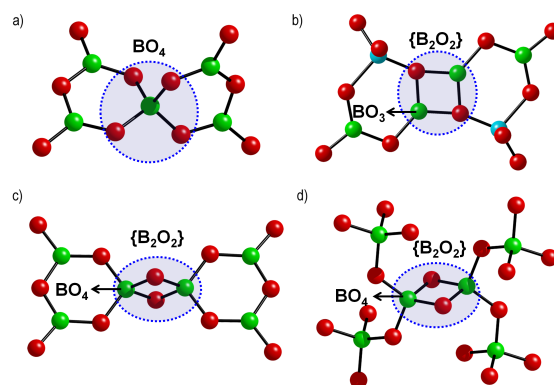

**Fig. S2** Comparison of **a**) the B $_5$ O $_{10}$  cluster, **b**) AlB $_5$ O $_{12}$  cluster in **1**, **c**) B $_6$ O $_{12}$  cluster in Ba $_4$ Na $_2$ Zn $_4$ (B $_3$ O $_6$ ) $_2$ (B $_{12}$ O $_{24}$ ), and **d**) B $_6$ O $_{18}$  unit in Dy $_4$ B $_6$ O $_{15}$ , respectively.

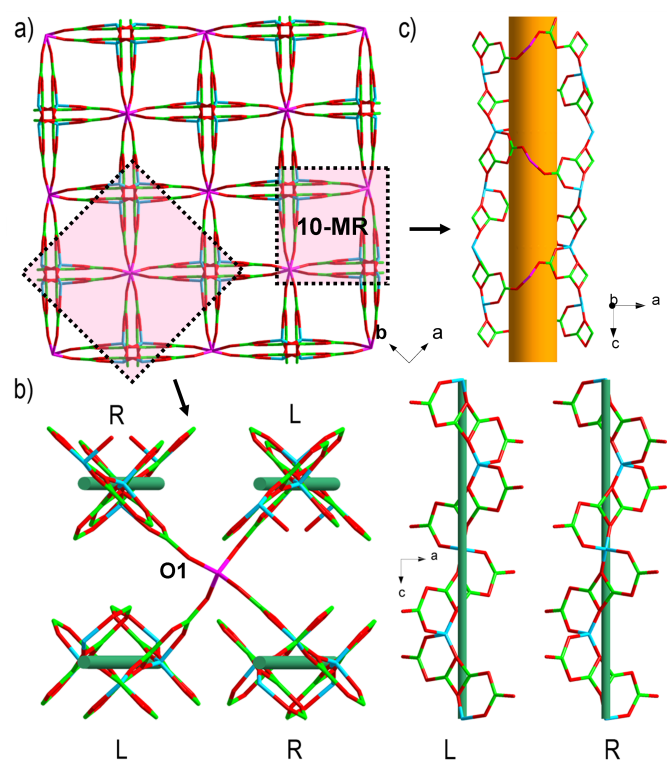

**Fig. S3** a) View of the framework with 12-MR channels along the  $c$ -axis. b) One Al atom links four helical chains with the left- and right-handedness through O(1) atoms. c) View of the 10-MR channels.

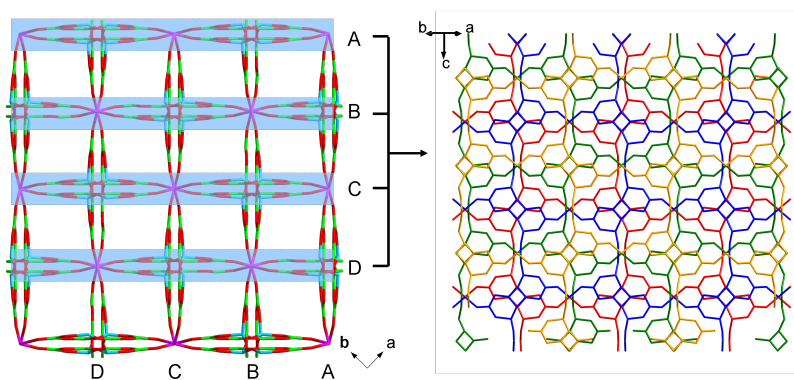

**Fig. S4** Stacking view of the ABCDA sequence of the ABO layers along  $[110]$  and  $[1-10]$  directions. The different colors represent different layers.

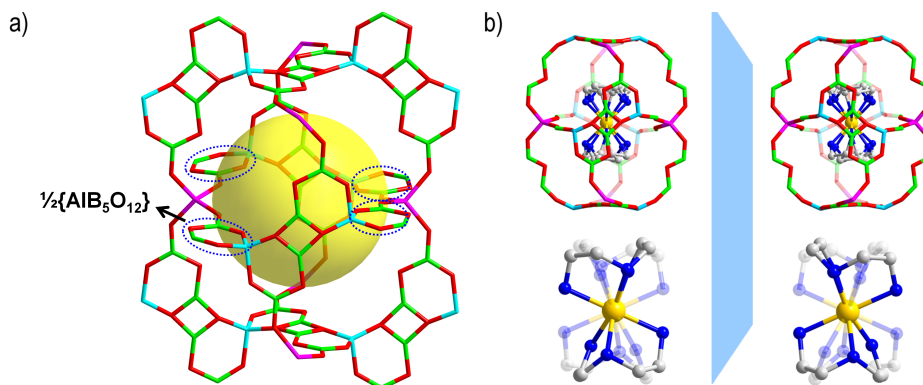

**Fig. S5** a) View of the cages constructed from six  $\text{AlO}_4$  and ten  $\{\text{AlB}_5\text{O}_{12}\}$  units. b) A pair of enantiomers of cavities of  $C_2$  symmetry, each of which contains a  $[\text{In}(\text{dien})_2]^{3+}$  cations of  $\Delta$  and  $\Lambda$  configuration. All of the  $[\text{In}(\text{dien})_2]^{3+}$  cations are in  $u$ -*fac*-configuration.

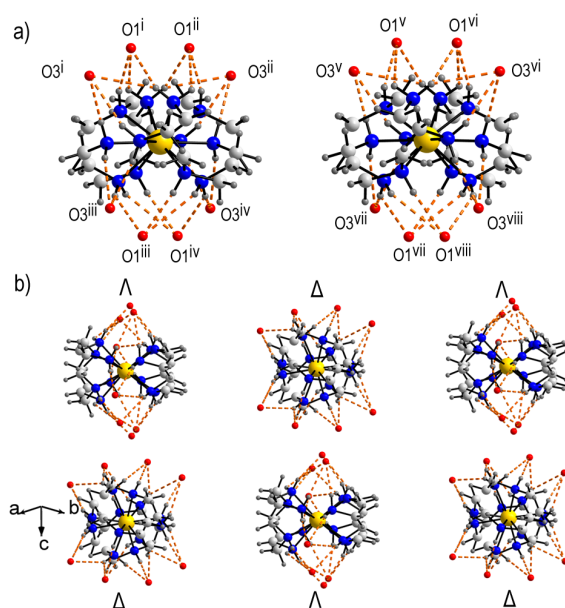

**Fig. S6** a) Chiral [In(dien)<sub>2</sub>]<sup>3+</sup> complexes with  $\Lambda$  and  $\Delta$  configurations interacted with framework O atoms via H-bonds, respectively. (Each In atoms is coordinated by four dien because each dien has the occupancy of 50%). b) View of the arrangement of the complexes with  $\Lambda$  and  $\Delta$  configurations interacted with framework O atoms via H-bonds. Symmetry codes: i,  $-x, -0.5+y, -0.5-z$ ; ii,  $x, 1-y, -0.5-z$ ; iii,  $-0.75+y, 0.25-x, -0.25+z$ ; iv,  $0.75-y, 0.25+x, -0.25+z$ ; v,  $0.5-x, 0.5-y, -0.5-z$ ; vi,  $0.5+x, -1+y, -0.5-z$ ; vii,  $-0.25+y, -0.25+x, -0.5+z$ ; viii,  $1.25-y, -0.25-x, -0.25+z$ .

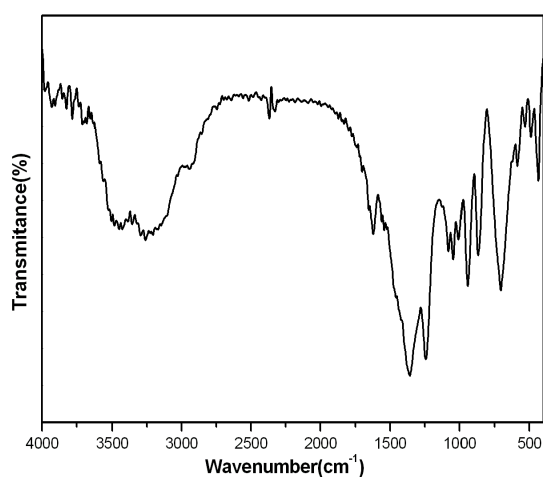

**Fig. S7** IR spectrum of **1**.

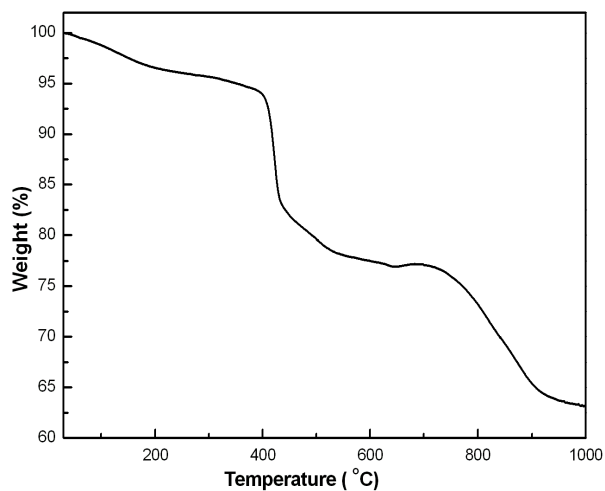

**Fig. S8** TGA curve of **1** under air atmosphere (10°C/min)



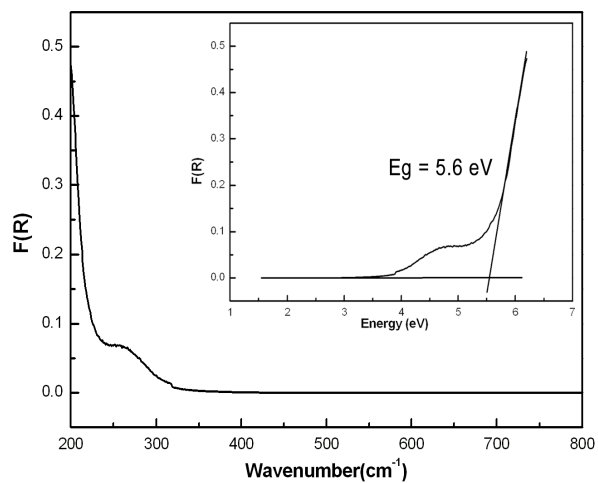

Fig. S9 UV-vis optical diffuse reflectance spectra for 1.

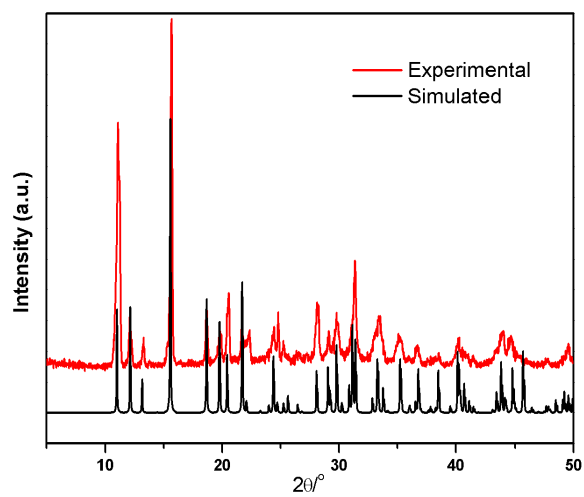

Fig. S10 The experimental and simulated PXRD patterns of 1.
